# Supplementary material
Source: PubMed Central journal article supplement (PMC3811043)
Supplement: NIHMS513193-supplement-1_si_001.pdf [file NIHMS513193-supplement-1_si_001.pdf]

Supporting Information for  
Nitric Oxide-Releasing Silica Nanoparticle-Doped Polyurethane Electrospun Fibers

Ahyeon Koh, Alexis W. Carpenter, Danielle L. Slomberg, and Mark H. Schoenfisch\*

*Department of Chemistry, University of North Carolina at Chapel Hill, Chapel Hill, NC, 27599, USA*

\*Corresponding Author: [schoenfisch@unc.edu](mailto:schoenfisch@unc.edu); Tel +1 (919) 843-8714; Fax +1 (919) 962-2388

**SI Table 1.** Characterization of nitric oxide-releasing silica particles.

| <i>Type of NO donor</i>    | <i>Particle composition</i> | <i>mol%</i> <sup>a</sup> | <i>Particle size</i> <sup>b</sup><br>(nm) | <i>[NO]<sub>max</sub></i> <sup>c</sup><br>(ppm mg <sup>-1</sup> ) | <i>t<sub>max</sub></i> <sup>d</sup><br>(min) | <i>Total [NO]</i> <sup>e</sup><br>(μmol mg <sup>-1</sup> ) | <i>t<sub>d</sub></i> <sup>f</sup><br>(h) |
|----------------------------|-----------------------------|--------------------------|-------------------------------------------|-------------------------------------------------------------------|----------------------------------------------|------------------------------------------------------------|------------------------------------------|
| <i>N</i> -diazoniumdiolate | AHAP3/TEOS                  | 65                       | 56 ± 7                                    | 23.2 ± 19.9                                                       | 0.9 ± 0.2                                    | 1.5 ± 0.3                                                  | 15.2 ± 2.1                               |
|                            | AHAP3/TEOS                  | 65                       | 93 ± 14                                   | 25.7 ± 2.9                                                        | 0.6 ± 0.1                                    | 1.3 ± 0.2                                                  | 13.0 ± 3.8                               |
|                            | AEAP3/TMOS                  | 70                       | 152 ± 2                                   | 1.9 ± 0.4                                                         | 0.9 ± 0.1                                    | 0.4 ± 0.2                                                  | 9.6 ± 2.2                                |
| <i>S</i> -nitrosothiol     | MPTMS/TEOS                  | 75                       | 416 ± 23                                  | 1.9 ± 0.4                                                         | 3.3 ± 0.1                                    | 3.2 ± 0.6                                                  | > 48                                     |

<sup>a</sup> Balance TEOS or TMOS backbone silane; <sup>b</sup> Particle size determined by electron microscope representing non-hydrated diameter of particle; <sup>c</sup> Maximum instantaneous concentration of NO released as measured with NOA; <sup>d</sup> Time required to reach [NO]<sub>max</sub>; <sup>e</sup> Total number of moles of NO released per mg of particle as measured by the Griess assay; <sup>f</sup> Duration of NO release.

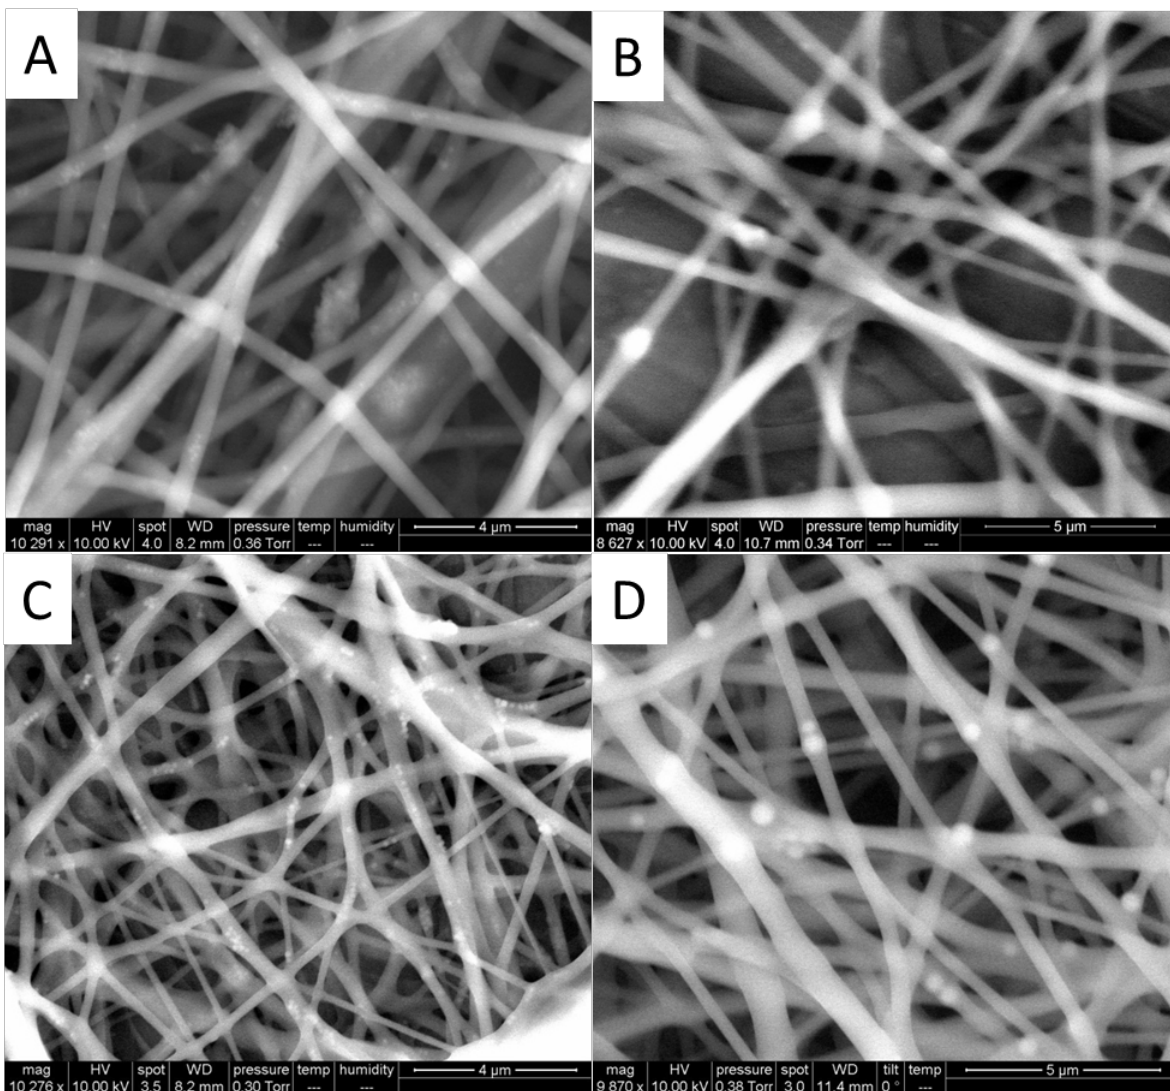

**SI Figure 1.** Environmental scanning electron microscopy images of 12% (w/v) Tecoflex electrospun fibers doped with 5 wt% of *N*-diazoniumdiolated (A) AHAP3/TEOS (~50 nm), (B) AHAP3/TEOS (~100 nm), and (C) AEAP3/TMOS and (D) *S*-nitrosothiol functionalized MPTMS/TEOS silica nanoparticles.

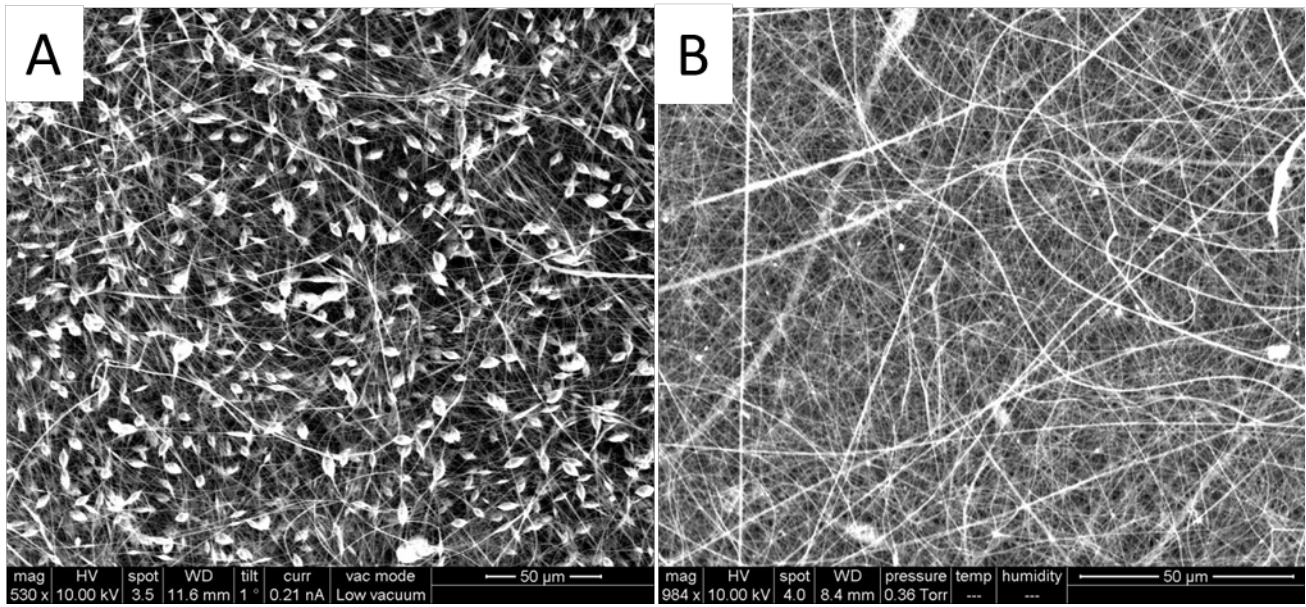

**SI Figure 2.** Environmental scanning electron microscopy images of 12% (w/v) Tecoplast electrospun fiber mat (A) without and (B) with 5 wt% of *N*-diazoniumdiolated AEAP3/TMOS particles.

**SI Table 2.** Silica particle leaching from NO-releasing silica particle-doped polyurethane electrospun fiber mats as a function of type of polyurethane and dopant after 7 d soaking in PBS at 37 °C.

| <i>NO-releasing silica nanoparticles<br/>(5 wt% of polyurethane mass)</i> | <i>Polyurethane<br/>(12% (w/v) polyurethane)</i> | <i>Silica particle leaching<br/>(%)</i> |
|---------------------------------------------------------------------------|--------------------------------------------------|-----------------------------------------|
| AHAP3/TEOS<br>(~ 50 nm)                                                   | Tecophilic                                       | 105.8 ± 12.9                            |
|                                                                           | Tecoflex                                         | 105.2 ± 10.3                            |
|                                                                           | Tecoplast                                        | 97.2 ± 9.7                              |
| AHAP3/TEOS<br>(~ 100 nm)                                                  | Tecophilic                                       | 79.7 ± 5.5                              |
|                                                                           | Tecoflex                                         | 84.6 ± 1.1                              |
|                                                                           | Tecoplast                                        | 58.9 ± 0.3                              |
| AEAP3/TMOS<br>(~ 200 nm)                                                  | Tecophilic                                       | 66.8 ± 14.3                             |
|                                                                           | Tecoflex                                         | 39.3 ± 3.2                              |
|                                                                           | Tecoplast                                        | 35.9 ± 9.2                              |
| MPTMS/TEOS<br>(~ 400 nm)                                                  | Tecophilic                                       | 2.1 ± 0.1                               |
|                                                                           | Tecoflex                                         | 0.8 ± 0.1                               |
|                                                                           | Tecoplast                                        | 0.7 ± 0.1                               |

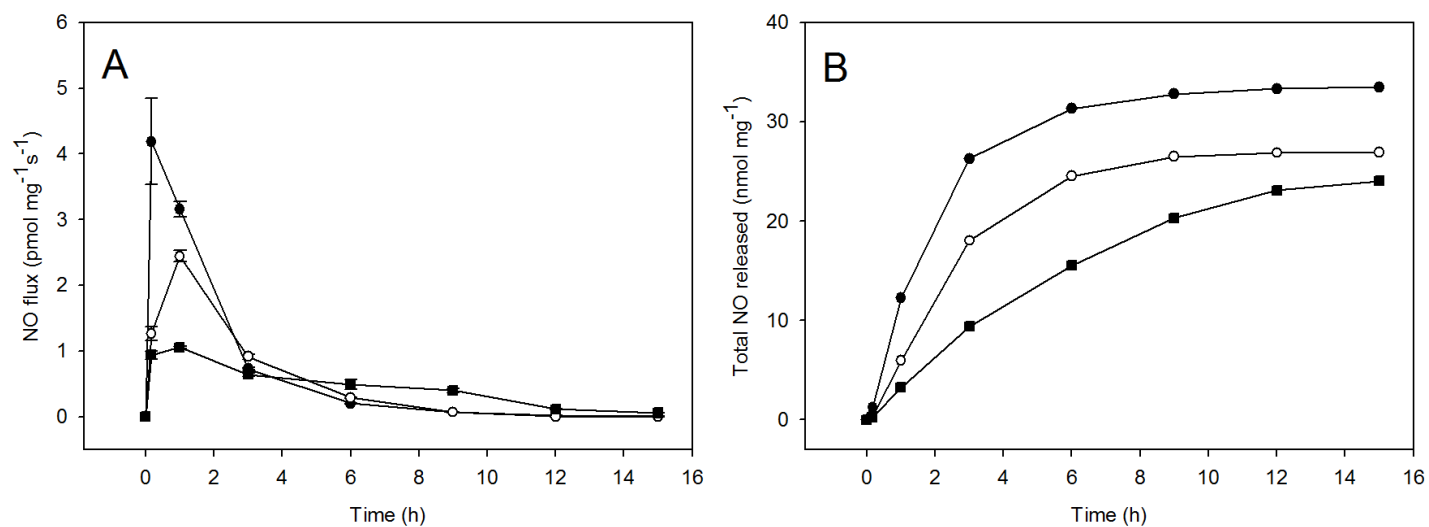

**SI Figure 3.** (A) Nitric oxide flux and (B) NO totals from 5 wt% AHAP3/TEOS (~50 nm) particle-doped electrospun polyurethane fiber mats with 12% (w/v) of (●) Tecophilic, (○) Tecoflex, and (■) Tecoplast polyurethane.

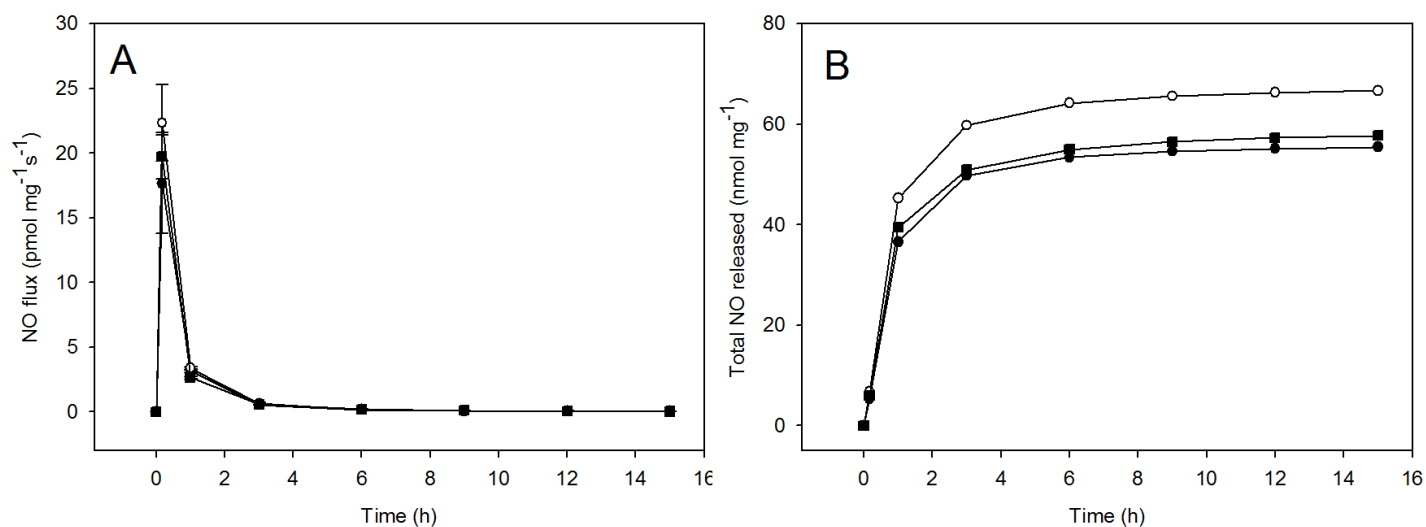

**SI Figure 4.** (A) Nitric oxide flux and (B) NO totals from 5 wt% AHAP3/TEOS (~100 nm) particle-doped electrospun polyurethane fiber mats with 12% (w/v) (●) Tecophilic, (○) Tecoflex, and (■) Tecoplast polyurethane.

**SI Table 3.** Nitric oxide release characteristics of 5 wt% *N*-diazoniumdiolated AEAP3/TMOS silica particle-doped Tecoplast electrospun fiber mats as a function of polyurethane solution concentration.

| <i>Concentration of polyurethane (% (w/v))</i> | <i>Fiber diameter (nm)</i> | $[NO]_{max}^a$<br>( $pmol\ mg^{-1}\ s^{-1}$ ) | $t_{max}^b$<br>( <i>min</i> ) | <i>Total NO released<sup>c</sup></i><br>( $nmol\ mg^{-1}$ ) | $t_d^d$<br>( <i>h</i> ) |
|------------------------------------------------|----------------------------|-----------------------------------------------|-------------------------------|-------------------------------------------------------------|-------------------------|
| 12                                             | 156 ± 30                   | 1.3 ± 0.3                                     | 3.1 ± 2.7                     | 7.5 ± 2.8                                                   | 14.3 ± 1.6              |
| 16                                             | 248 ± 107                  | 1.3 ± 0.6                                     | 1.7 ± 0.8                     | 6.1 ± 0.2                                                   | 14.4 ± 1.5              |
| 20                                             | 388 ± 59                   | 1.4 ± 0.2                                     | 7.2 ± 4.9                     | 7.9 ± 0.2                                                   | 13.7 ± 0.9              |

<sup>a</sup> Maximum instantaneous concentration of NO released as measured with NOA; <sup>b</sup> Time required to reach  $[NO]_{max}$ ; <sup>c</sup> Total number of moles of NO released per mg of particle-doped fiber mat as measured by the Griess assay; <sup>d</sup> Duration of NO release.



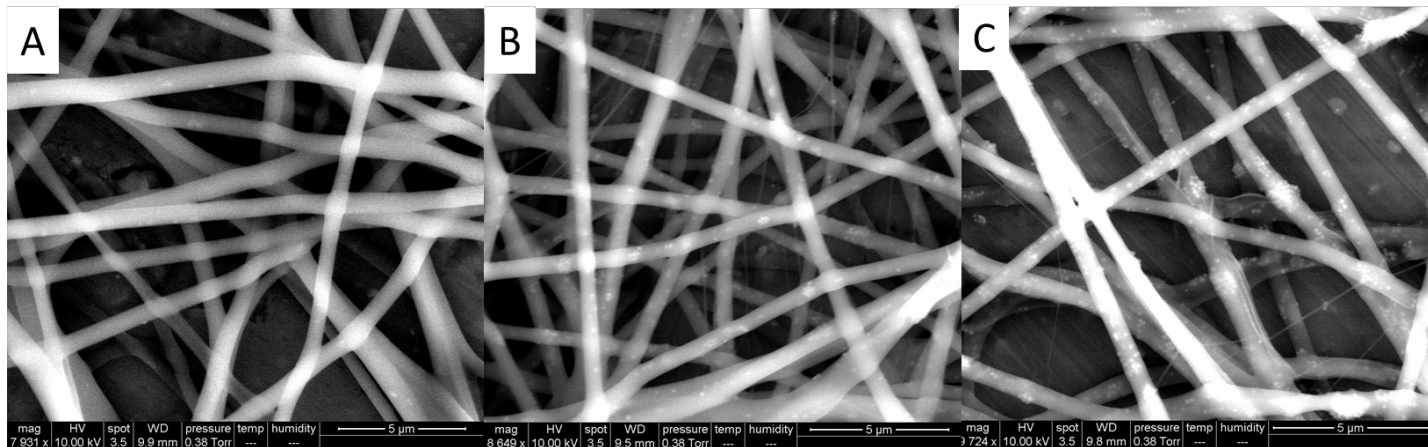

**SI Figure 5.** Environmental scanning electron microscopy images of AEAP3/TMOS particle-doped 12% (w/v) Tecophilic electrospun fiber mats as a function of dopant concentration, (A) 1, (B) 5, and (C) 10 wt%. Scale bar indicates 5  $\mu\text{m}$ .
